# Supplementary material for: Global, regional, and national burden of non-COVID-19 lower respiratory infections and risks, 1990–2023: a systematic analysis from GBD Study 2023
Source: Research Square preprint supplement (doi:10.21203/rs.3.rs-7536537/v1), 2025-09-23
Supplement: Supplementary file 1 [file 5ea47d94bfc0fdbc16474825.docx]

| Table S1. Distribution of the DALYs rates for lower respiratory infections caused by risk factors in WHO Regions, 2023 (per 100,000population) | | | | | | |
| --- | --- | --- | --- | --- | --- | --- |
| Location |  | Rank |  | Risks |  | DALYs rate (95%UI) |
| African Region |  | 1 |  | Child underweight |  | 1010.57(78.48,1848.6) |
| African Region |  | 2 |  | Household air pollution from solid fuels |  | 976.92(433.42,1408.04) |
| African Region |  | 3 |  | Child stunting |  | 835.37(537.85,1160.01) |
| African Region |  | 4 |  | No access to handwashing facility |  | 719.07(-578.68,1877.91) |
| African Region |  | 5 |  | Child wasting |  | 516.65(296.94,823.51) |
| African Region |  | 6 |  | Low birth weight |  | 349.6(247.63,489.93) |
| African Region |  | 7 |  | Ambient particulate matter pollution |  | 291.78(129.03,457.4) |
| African Region |  | 8 |  | Secondhand smoke |  | 185.62(126.34,260.72) |
| African Region |  | 9 |  | Short gestation |  | 151.05(107.18,218.62) |
| African Region |  | 10 |  | Non-exclusive breastfeeding |  | 141.41(79.26,217.95) |
| African Region |  | 11 |  | High temperature |  | 109.77(56.35,185.73) |
| African Region |  | 12 |  | Low temperature |  | 62.04(43.13,97.93) |
| African Region |  | 13 |  | Smoking |  | 46.57(29.06,72.92) |
| African Region |  | 14 |  | High alcohol use |  | 9.84(0.31,22.81) |
| Eastern Mediterranean Region |  | 1 |  | Child underweight |  | 322.98(25.56,581.72) |
| Eastern Mediterranean Region |  | 2 |  | Child stunting |  | 234.69(147.26,343.12) |
| Eastern Mediterranean Region |  | 3 |  | Household air pollution from solid fuels |  | 205.18(91.78,306.64) |
| Eastern Mediterranean Region |  | 4 |  | Child wasting |  | 198.88(115.29,301.34) |
| Eastern Mediterranean Region |  | 5 |  | Low birth weight |  | 182.58(129.36,259.46) |
| Eastern Mediterranean Region |  | 6 |  | Ambient particulate matter pollution |  | 164.37(78.55,247.32) |
| Eastern Mediterranean Region |  | 7 |  | Secondhand smoke |  | 126.66(83.95,176.73) |
| Eastern Mediterranean Region |  | 8 |  | No access to handwashing facility |  | 111.84(-75.22,320.43) |
| Eastern Mediterranean Region |  | 9 |  | High temperature |  | 95.45(20.24,176.02) |
| Eastern Mediterranean Region |  | 10 |  | Short gestation |  | 87.74(61.67,122.98) |
| Eastern Mediterranean Region |  | 11 |  | Non-exclusive breastfeeding |  | 71.67(40.95,117.46) |
| Eastern Mediterranean Region |  | 12 |  | Low temperature |  | 66.53(34.22,109.69) |
| Eastern Mediterranean Region |  | 13 |  | Smoking |  | 37.44(24.46,55.58) |
| Eastern Mediterranean Region |  | 14 |  | High alcohol use |  | 0.24(0.01,0.57) |
| European Region |  | 1 |  | Low temperature |  | 98.46(87.23,106.3) |
| European Region |  | 2 |  | Smoking |  | 82.29(64.6,102.22) |
| European Region |  | 3 |  | Ambient particulate matter pollution |  | 71.02(27.42,102.37) |
| European Region |  | 4 |  | Secondhand smoke |  | 52.81(37.87,70.55) |
| European Region |  | 5 |  | Child underweight |  | 43.83(1.65,92.93) |
| European Region |  | 6 |  | Low birth weight |  | 31.24(28.2,34.06) |
| European Region |  | 7 |  | Child stunting |  | 30.81(19.97,41.55) |
| European Region |  | 8 |  | Child wasting |  | 26.75(16.89,35.62) |
| European Region |  | 9 |  | High alcohol use |  | 23.34(0.59,49.1) |
| European Region |  | 10 |  | Non-exclusive breastfeeding |  | 19.88(12.02,28.08) |
| European Region |  | 11 |  | No access to handwashing facility |  | 11.09(-6.51,38.86) |
| European Region |  | 12 |  | Household air pollution from solid fuels |  | 8.51(2.61,16.94) |
| European Region |  | 13 |  | Short gestation |  | 8.38(6.6,10.2) |
| European Region |  | 14 |  | High temperature |  | 4.89(-2.82,11.34) |
| Region of the Americas |  | 1 |  | Ambient particulate matter pollution |  | 70.59(27.26,103.75) |
| Region of the Americas |  | 2 |  | Smoking |  | 67.78(48.89,89.84) |
| Region of the Americas |  | 3 |  | Child underweight |  | 50.16(2.08,102.06) |
| Region of the Americas |  | 4 |  | Secondhand smoke |  | 49.04(34.85,64.81) |
| Region of the Americas |  | 5 |  | Low temperature |  | 46.07(40.02,51.81) |
| Region of the Americas |  | 6 |  | Child stunting |  | 42.46(29.72,55.08) |
| Region of the Americas |  | 7 |  | No access to handwashing facility |  | 31.56(-19.71,98.42) |
| Region of the Americas |  | 8 |  | Household air pollution from solid fuels |  | 25.18(10.32,40.63) |
| Region of the Americas |  | 9 |  | Low birth weight |  | 21.51(18.32,25.98) |
| Region of the Americas |  | 10 |  | High alcohol use |  | 19.44(0.5,43.47) |
| Region of the Americas |  | 11 |  | Child wasting |  | 16.46(9.66,23.18) |
| Region of the Americas |  | 12 |  | Non-exclusive breastfeeding |  | 16.05(11.27,21.42) |
| Region of the Americas |  | 13 |  | High temperature |  | 9.21(1.11,18.32) |
| Region of the Americas |  | 14 |  | Short gestation |  | 8.18(6.09,10.88) |
| South-East Asia Region |  | 1 |  | Child underweight |  | 276.98(20.41,444.47) |
| South-East Asia Region |  | 2 |  | Low birth weight |  | 227.53(183.43,274.25) |
| South-East Asia Region |  | 3 |  | Household air pollution from solid fuels |  | 216.18(97.64,333.78) |
| South-East Asia Region |  | 4 |  | Child stunting |  | 197.51(124.29,264.22) |
| South-East Asia Region |  | 5 |  | Child wasting |  | 192.36(127.21,261.68) |
| South-East Asia Region |  | 6 |  | Ambient particulate matter pollution |  | 165.2(71.05,241.91) |
| South-East Asia Region |  | 7 |  | Short gestation |  | 129.14(101.48,160.37) |
| South-East Asia Region |  | 8 |  | Secondhand smoke |  | 128.77(88.87,174.24) |
| South-East Asia Region |  | 9 |  | No access to handwashing facility |  | 99.69(-62.6,291.43) |
| South-East Asia Region |  | 10 |  | High temperature |  | 81.46(17.99,136.1) |
| South-East Asia Region |  | 11 |  | Non-exclusive breastfeeding |  | 59.51(35.45,91.11) |
| South-East Asia Region |  | 12 |  | Smoking |  | 48.53(33.09,69.46) |
| South-East Asia Region |  | 13 |  | Low temperature |  | 32.17(4.48,62.59) |
| South-East Asia Region |  | 14 |  | High alcohol use |  | 4.07(0.1,9.86) |
| Western Pacific Region |  | 1 |  | Ambient particulate matter pollution |  | 59.3(23.78,87.2) |
| Western Pacific Region |  | 2 |  | Smoking |  | 58.45(45.13,75.1) |
| Western Pacific Region |  | 3 |  | Secondhand smoke |  | 48.88(33.85,64.16) |
| Western Pacific Region |  | 4 |  | Household air pollution from solid fuels |  | 36.91(15.02,61.72) |
| Western Pacific Region |  | 5 |  | Child underweight |  | 35.3(2.03,62.33) |
| Western Pacific Region |  | 6 |  | Low temperature |  | 31.67(25.96,37.92) |
| Western Pacific Region |  | 7 |  | Child stunting |  | 25.91(18.3,34.73) |
| Western Pacific Region |  | 8 |  | Child wasting |  | 18.15(11.35,26.32) |
| Western Pacific Region |  | 9 |  | No access to handwashing facility |  | 16.69(-9.66,51.42) |
| Western Pacific Region |  | 10 |  | Low birth weight |  | 15.61(12.34,19.64) |
| Western Pacific Region |  | 11 |  | High alcohol use |  | 10.41(0.23,24.78) |
| Western Pacific Region |  | 12 |  | Non-exclusive breastfeeding |  | 7.87(5.26,11.15) |
| Western Pacific Region |  | 13 |  | High temperature |  | 5.89(-0.05,12.7) |
| Western Pacific Region |  | 14 |  | Short gestation |  | 5.52(3.82,7.4) |
| DALYs: Disability-Adjusted Life Years; UI: Uncertainty Interval; WHO: World Health Organization | | | | | | |

| Table S2. Distribution of the deaths rates for lower respiratory infectionscaused by risk factors in WHO Regions, 2023 (per 100,000population) | | | | | | |
| --- | --- | --- | --- | --- | --- | --- |
| Location |  | Rank |  | Risks |  | Deaths rate(95%UI) |
| African Region |  | 1 |  | Household air pollution from solid fuels |  | 15.74(7.02,23.11) |
| African Region |  | 2 |  | No access to handwashing facility |  | 11.61(-9.83,30.37) |
| African Region |  | 3 |  | Child underweight |  | 11.43(0.89,20.89) |
| African Region |  | 4 |  | Child stunting |  | 9.48(6.1,13.18) |
| African Region |  | 5 |  | Child wasting |  | 5.83(3.34,9.3) |
| African Region |  | 6 |  | Ambient particulate matter pollution |  | 4.62(2.02,7.22) |
| African Region |  | 7 |  | Low birth weight |  | 3.89(2.75,5.45) |
| African Region |  | 8 |  | Secondhand smoke |  | 2.98(1.97,4.13) |
| African Region |  | 9 |  | Short gestation |  | 1.68(1.19,2.43) |
| African Region |  | 10 |  | Non-exclusive breastfeeding |  | 1.57(0.88,2.43) |
| African Region |  | 11 |  | High temperature |  | 1.57(0.79,2.63) |
| African Region |  | 12 |  | Smoking |  | 1.44(0.89,2.24) |
| African Region |  | 13 |  | Low temperature |  | 1.21(0.89,1.7) |
| African Region |  | 14 |  | High alcohol use |  | 0.29(0.01,0.68) |
| Eastern Mediterranean Region |  | 1 |  | Child underweight |  | 3.63(0.29,6.53) |
| Eastern Mediterranean Region |  | 2 |  | Ambient particulate matter pollution |  | 3.19(1.46,4.77) |
| Eastern Mediterranean Region |  | 3 |  | Household air pollution from solid fuels |  | 2.98(1.32,4.43) |
| Eastern Mediterranean Region |  | 4 |  | Child stunting |  | 2.65(1.67,3.87) |
| Eastern Mediterranean Region |  | 5 |  | Child wasting |  | 2.23(1.29,3.38) |
| Eastern Mediterranean Region |  | 6 |  | Secondhand smoke |  | 2.06(1.36,2.84) |
| Eastern Mediterranean Region |  | 7 |  | Low birth weight |  | 2.03(1.44,2.88) |
| Eastern Mediterranean Region |  | 8 |  | No access to handwashing facility |  | 1.73(-1.18,5.12) |
| Eastern Mediterranean Region |  | 9 |  | High temperature |  | 1.65(0.34,2.97) |
| Eastern Mediterranean Region |  | 10 |  | Smoking |  | 1.44(0.92,2.21) |
| Eastern Mediterranean Region |  | 11 |  | Low temperature |  | 1.19(0.68,1.85) |
| Eastern Mediterranean Region |  | 12 |  | Short gestation |  | 0.98(0.69,1.37) |
| Eastern Mediterranean Region |  | 13 |  | Non-exclusive breastfeeding |  | 0.8(0.46,1.31) |
| Eastern Mediterranean Region |  | 14 |  | High alcohol use |  | 0.01(0,0.02) |
| European Region |  | 1 |  | Low temperature |  | 4.61(3.98,5.19) |
| European Region |  | 2 |  | Smoking |  | 3.26(2.51,4.16) |
| European Region |  | 3 |  | Ambient particulate matter pollution |  | 2.55(0.97,3.75) |
| European Region |  | 4 |  | Secondhand smoke |  | 1.71(1.18,2.29) |
| European Region |  | 5 |  | High alcohol use |  | 1.18(0.03,2.5) |
| European Region |  | 6 |  | Child underweight |  | 0.49(0.02,1.04) |
| European Region |  | 7 |  | No access to handwashing facility |  | 0.36(-0.21,1.31) |
| European Region |  | 8 |  | Low birth weight |  | 0.35(0.31,0.38) |
| European Region |  | 9 |  | Child stunting |  | 0.35(0.23,0.47) |
| European Region |  | 10 |  | Child wasting |  | 0.3(0.19,0.4) |
| European Region |  | 11 |  | Non-exclusive breastfeeding |  | 0.22(0.13,0.31) |
| European Region |  | 12 |  | Household air pollution from solid fuels |  | 0.14(0.04,0.36) |
| European Region |  | 13 |  | High temperature |  | 0.1(-0.15,0.31) |
| European Region |  | 14 |  | Short gestation |  | 0.09(0.07,0.11) |
| Region of the Americas |  | 1 |  | Ambient particulate matter pollution |  | 2.93(1.13,4.36) |
| Region of the Americas |  | 2 |  | Smoking |  | 2.91(2.06,3.96) |
| Region of the Americas |  | 3 |  | Low temperature |  | 2.24(1.91,2.54) |
| Region of the Americas |  | 4 |  | Secondhand smoke |  | 1.83(1.3,2.44) |
| Region of the Americas |  | 5 |  | No access to handwashing facility |  | 1.06(-0.66,3.57) |
| Region of the Americas |  | 6 |  | High alcohol use |  | 0.82(0.02,1.84) |
| Region of the Americas |  | 7 |  | Household air pollution from solid fuels |  | 0.56(0.22,1) |
| Region of the Americas |  | 8 |  | Child underweight |  | 0.56(0.02,1.15) |
| Region of the Americas |  | 9 |  | Child stunting |  | 0.48(0.34,0.62) |
| Region of the Americas |  | 10 |  | High temperature |  | 0.39(0.02,0.79) |
| Region of the Americas |  | 11 |  | Low birth weight |  | 0.24(0.2,0.29) |
| Region of the Americas |  | 12 |  | Child wasting |  | 0.18(0.11,0.26) |
| Region of the Americas |  | 13 |  | Non-exclusive breastfeeding |  | 0.18(0.13,0.24) |
| Region of the Americas |  | 14 |  | Short gestation |  | 0.09(0.07,0.12) |
| South-East Asia Region |  | 1 |  | Household air pollution from solid fuels |  | 4.47(2.1,7.05) |
| South-East Asia Region |  | 2 |  | Ambient particulate matter pollution |  | 4.01(1.74,6.04) |
| South-East Asia Region |  | 3 |  | Child underweight |  | 3.11(0.23,4.98) |
| South-East Asia Region |  | 4 |  | Secondhand smoke |  | 2.72(1.85,3.66) |
| South-East Asia Region |  | 5 |  | Low birth weight |  | 2.53(2.04,3.05) |
| South-East Asia Region |  | 6 |  | Child stunting |  | 2.22(1.4,2.97) |
| South-East Asia Region |  | 7 |  | No access to handwashing facility |  | 2.22(-1.41,6.42) |
| South-East Asia Region |  | 8 |  | Smoking |  | 2.18(1.49,3.07) |
| South-East Asia Region |  | 9 |  | Child wasting |  | 2.15(1.42,2.93) |
| South-East Asia Region |  | 10 |  | High temperature |  | 1.71(0.36,2.81) |
| South-East Asia Region |  | 11 |  | Short gestation |  | 1.44(1.13,1.78) |
| South-East Asia Region |  | 12 |  | Low temperature |  | 0.68(0.11,1.27) |
| South-East Asia Region |  | 13 |  | Non-exclusive breastfeeding |  | 0.66(0.39,1.01) |
| South-East Asia Region |  | 14 |  | High alcohol use |  | 0.17(0,0.41) |
| Western Pacific Region |  | 1 |  | Ambient particulate matter pollution |  | 2.96(1.13,4.38) |
| Western Pacific Region |  | 2 |  | Smoking |  | 2.85(2.15,3.74) |
| Western Pacific Region |  | 3 |  | Low temperature |  | 1.94(1.55,2.31) |
| Western Pacific Region |  | 4 |  | Secondhand smoke |  | 1.92(1.29,2.6) |
| Western Pacific Region |  | 5 |  | Household air pollution from solid fuels |  | 1.08(0.42,2.01) |
| Western Pacific Region |  | 6 |  | No access to handwashing facility |  | 0.57(-0.32,1.92) |
| Western Pacific Region |  | 7 |  | High alcohol use |  | 0.52(0.01,1.24) |
| Western Pacific Region |  | 8 |  | Child underweight |  | 0.4(0.02,0.7) |
| Western Pacific Region |  | 9 |  | High temperature |  | 0.31(-0.01,0.65) |
| Western Pacific Region |  | 10 |  | Child stunting |  | 0.29(0.21,0.39) |
| Western Pacific Region |  | 11 |  | Child wasting |  | 0.2(0.13,0.3) |
| Western Pacific Region |  | 12 |  | Low birth weight |  | 0.17(0.14,0.22) |
| Western Pacific Region |  | 13 |  | Non-exclusive breastfeeding |  | 0.09(0.06,0.12) |
| Western Pacific Region |  | 14 |  | Short gestation |  | 0.06(0.04,0.08) |
| DALYs: Disability-Adjusted Life Years; UI: Uncertainty Interval; WHO: World Health Organization | | | | | | |
